# Supplementary material for: Acute respiratory illness and return to sport: a systematic review and meta-analysis by a subgroup of the IOC consensus on ‘acute respiratory illness in the athlete’
Source: HighWire-hosted journal article supplement (doi:10.1136/bjsports-2021-104719), 2021-11-17

## Online Supplementary Figure 1

## Frequency (%) time loss ARill by anatomical classification: Upper ARill vs. General (upper/lower) ARill

| Studies                                                                       | Estimate (95% C.I.)         | Ev/Trt          |
|-------------------------------------------------------------------------------|-----------------------------|-----------------|
| Alonso et al. (2012)                                                          | 0.217 (0.049, 0.386)        | 5/23            |
| Dressendorfer et al. (2002)                                                   | 0.200 (-0.151, 0.551)       | 1/5             |
| Edouard et al. (2013)                                                         | 0.125 (-0.104, 0.354)       | 1/8             |
| Edouard et al. (2014)                                                         | 0.444 (0.120, 0.769)        | 4/9             |
| Edouard et al. (2015)                                                         | 0.500 (0.154, 0.846)        | 4/8             |
| Orhant et al. (2010)a                                                         | 0.113 (0.062, 0.163)        | 17/151          |
| Schwellnus et al. (2012)b                                                     | 0.181 (0.092, 0.269)        | 13/72           |
| <b>Subgroup Upper ARill (I<sup>2</sup>=41.95 % , P=0.111)</b>                 | <b>0.184 (0.107, 0.261)</b> | <b>45/276</b>   |
| Derman et al. (2014)                                                          | 0.125 (0.072, 0.178)        | 19/152          |
| Nordstrom et al. (2020)                                                       | 0.351 (0.275, 0.427)        | 53/151          |
| Schwellnus et al. (2012)a                                                     | 0.192 (0.041, 0.344)        | 5/26            |
| Soligard et al. (2017)                                                        | 0.185 (0.140, 0.229)        | 54/292          |
| Steffen et al. (2019)                                                         | 0.220 (0.158, 0.283)        | 37/168          |
| <b>Subgroup General (Upper/Lower) ARill (I<sup>2</sup>=83.15 % , P=0.000)</b> | <b>0.213 (0.141, 0.285)</b> | <b>168/789</b>  |
| <b>Overall (I<sup>2</sup>=71.32 % , P=0.000)</b>                              | <b>0.203 (0.151, 0.255)</b> | <b>213/1065</b> |

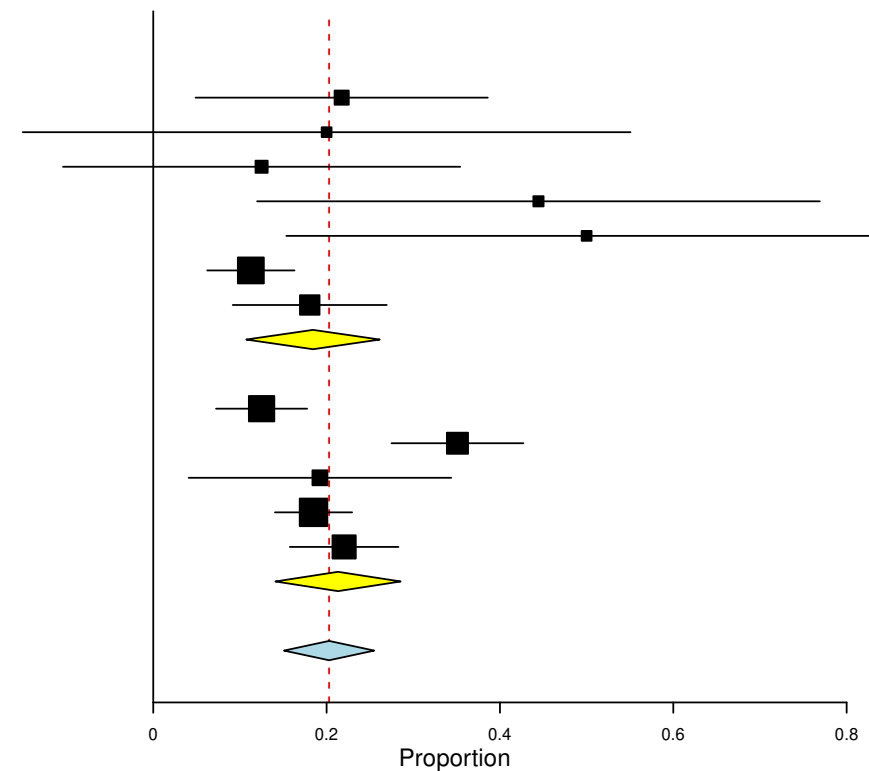

Supplement: bjsports-2021-104719supp001_data_supplement.pdf [file bjsports-2021-104719supp001_data_supplement.pdf]
