# Supplementary material for: Acute respiratory illness and return to sport: a systematic review and meta-analysis by a subgroup of the IOC consensus on ‘acute respiratory illness in the athlete’
Source: HighWire-hosted journal article supplement (doi:10.1136/bjsports-2021-104719), 2021-11-17
Supplement: bjsports-2021-104719supp002_data_supplement.pdf [file bjsports-2021-104719supp002_data_supplement.pdf]

## Online Supplementary File 1:

### Specific Search Strategies

**PubMed: Search:** (Rhinovirus OR Parainfluenza OR Adenovirus OR coronavirus OR "human metapneumovirus" OR enterovirus OR "respiratory syncytial virus" OR "bordetella pertussis" OR "chlamydomydia pneumoniae" OR "mycoplasma pneumoniae" OR Rhinitis OR influenza OR "common cold" OR flu OR sinusitis OR "rhino sinusitis" OR "acute pharyngitis" OR tonsillitis OR pharyngitis OR epiglottitis OR laryngitis OR "Haemophilus influenzae" OR "Streptococcus pneumoniae" OR "Klebsiella pneumoniae" OR "Moraxella catarrhalis" OR pneumonia OR pneumoniae OR bronchitis OR "lung disease" OR "Respiratory tract disease\*" OR "Respiratory illness\*" OR "Respiratory tract infection\*" OR "respiration disorder\*" OR "respiratory system disease\*" OR "upper respiratory tract illness\*" OR "upper respiratory tract disease\*" OR "Lower respiratory tract illness\*" OR "Lower respiratory tract disease\*" OR "Viral disease\*" OR "pulmonary tuberculosis" OR "laryngopharyngeal reflux" OR "supraesophageal gastric reflux" OR "non-infective acute respiratory illness" OR "air pollution" OR chemical\* OR "non-infective acute respiratory disease\*" OR "non-infective acute respiratory tract illness" OR "non-infective acute respiratory tract disease" OR "air pollution" OR weather OR climate OR chlorin\* OR allerg\* OR (inhal\* AND gas\*) OR "air quality" OR rhinoconjunctivitis) AND (athlete\* OR sport\* OR exercise\* OR "athletic population" OR "active population" OR "active individual" OR military) AND ("Normalisation of organ function\*" OR "Return to sport" OR "return to play" OR "return to performance" OR "return to activity" OR "Return to Sport\* Activities" OR "Resumption of Sport\*Activity\*" OR "sport\* activity resumption" OR Recovery OR "Recovery of function" OR Convalescence OR "athlete availability" OR "return to training" OR clearance) NOT (COPD OR "chronic obstructive pulmonary disease" OR cancer OR animal\* OR HIV OR "human immunodeficiency virus" OR AIDS OR "acquired immunodeficiency syndrome" OR post-operative OR postoperative OR preoperative OR pre-operative OR pre-surgery OR post-surgery OR food OR radiation OR "position statement" OR "consensus statement" OR "systematic review" OR infant OR "influenza pandemic" OR "water immersion" OR concussion OR psychology\* OR diabetes OR "cystic fibrosis" OR congenital OR combat OR wound OR groin OR lupus OR cryotherapy OR sleep OR bronchiectasis OR elderly OR Hajj OR "cooling kit" OR alcohol OR hyperoxia OR EMG OR war) **Filters:** Humans, English, MEDLINE, from 1990 – 2020

**EbscoHost:** "Human AND (Rhinovirus OR Parainfluenza OR Adenovirus OR coronavirus OR "human metapneumovirus" OR enterovirus OR "respiratory syncytial virus" OR "bordetella pertussis" OR "chlamydomydia pneumoniae" OR "mycoplasma pneumoniae" OR Rhinitis OR influenza OR "common cold" OR flu OR sinusitis OR "rhino sinusitis" OR "acute pharyngitis" OR tonsillitis OR pharyngitis OR epiglottitis OR laryngitis OR "Haemophilus influenzae" OR "Streptococcus pneumoniae" OR "Klebsiella pneumoniae" OR "Moraxella catarrhalis" OR pneumonia OR pneumoniae OR bronchitis OR "lung disease" OR "Respiratory tract disease\*" OR "Respiratory illness\*" OR "Respiratory tract infection\*" OR "respiration disorder\*" OR "respiratory system disease\*" OR "upper respiratory tract illness\*" OR "upper respiratory tract disease\*" OR "Lower respiratory tract illness\*" OR "Lower respiratory tract disease\*" OR "Viral disease\*" OR "pulmonary tuberculosis" OR "laryngopharyngeal reflux" OR "supraesophageal gastric reflux" OR "non-infective acute respiratory illness" OR "air pollution" OR chemical\* OR "non-infective acute respiratory disease\*" OR "non-infective acute respiratory tract illness" OR "non-infective acute respiratory tract disease" OR "air pollution" OR weather OR climate OR chlorin\* OR allerg\* OR (inhal\* AND gas\*) OR "air quality" OR rhinoconjunctivitis) AND (athlete\* OR sport\* OR exercise\* OR "athletic population" OR "active population" OR "active individual" OR military) AND ("Normalisation of organ function\*" OR "Return to sport" OR "return to play" OR "return to performance" OR "return to activity" OR "Return to Sport\* Activities" OR "Resumption of Sport\*Activity\*" OR "sport\* activity resumption" OR Recovery OR "Recovery of function" OR Convalescence OR "athlete availability" OR "return to training" OR clearance) NOT (COPD OR "chronic obstructive pulmonary disease" OR cancer OR animal\* OR HIV OR "human

immunodeficiency virus” OR AIDS OR “acquired immunodeficiency syndrome” OR post-operative OR postoperative OR preoperative OR pre-operative OR pre-surgery OR post-surgery OR food OR radiation OR “position statement” OR “consensus statement” OR “systematic review” OR infant OR “influenza pandemic” OR “water immersion” OR concussion OR psychology\* OR diabetes OR “cystic fibrosis” OR congenital OR combat OR wound OR groin OR lupus OR cryotherapy OR sleep OR bronchiectasis OR elderly OR Hajj OR “cooling kit” OR alcohol OR hyperoxia OR EMG OR war) Published Date: 19910101-20200731; Document Type: Article

**Web of Science:** TOPIC: (Human AND (Rhinovirus OR Parainfluenza OR Adenovirus OR coronavirus OR “human metapneumovirus” OR enterovirus OR “respiratory syncytial virus” OR “bordetella pertussis” OR “chlamydomydia pneumoniae” OR “mycoplasma pneumoniae” OR Rhinitis OR influenza OR “common cold” OR flu OR sinusitis OR “rhino sinusitis” OR “acute pharyngitis” OR tonsillitis OR pharyngitis OR epiglottitis OR laryngitis OR “Haemophilus influenzae” OR “Streptococcus pneumoniae” OR “Klebsiella pneumoniae” OR “Moraxella catarrhalis” OR pneumonia OR pneumoniae OR bronchitis OR “lung disease” OR “Respiratory tract disease\*” OR “Respiratory illness\*” OR “Respiratory tract infection\*” OR “respiration disorder\*” OR “respiratory system disease\*” OR “upper respiratory tract illness\*” OR “upper respiratory tract disease\*” OR “Lower respiratory tract illness\*” OR “Lower respiratory tract disease\*” OR “Viral disease\*” OR “pulmonary tuberculosis” OR “laryngopharyngeal reflux” OR “supraesophageal gastric reflux” OR “non-infective acute respiratory illness” OR “air pollution” OR chemical\* OR “non-infective acute respiratory disease\*” OR “non-infective acute respiratory tract illness” OR “non-infective acute respiratory tract disease” OR “air pollution” OR weather OR climate OR chlorin\* OR allerg\* OR (inhal\* AND gas\*) OR “air quality” OR rhinoconjunctivitis) AND (athlete\* OR sport\* OR exercise\* OR “athletic population” OR “active population” OR “active individual” OR military) AND (“Normalisation of organ function\*” OR “Return to sport” OR “return to play” OR “return to performance” OR “return to activity” OR “Return to Sport\* Activities” OR “Resumption of Sport\* Activity\*” OR “sport\* activity resumption” OR Recovery OR “Recovery of function” OR Convalescence OR “athlete availability” OR “return to training” OR clearance) NOT (COPD OR “chronic obstructive pulmonary disease” OR cancer OR animal\* OR HIV OR “human immunodeficiency virus” OR AIDS OR “acquired immunodeficiency syndrome” OR post-operative OR postoperative OR preoperative OR pre-operative OR pre-surgery OR post-surgery OR food OR radiation OR “position statement” OR “consensus statement” OR “systematic review” OR infant OR “influenza pandemic” OR “water immersion” OR concussion OR psychology\* OR diabetes OR “cystic fibrosis” OR congenital OR combat OR wound OR groin OR lupus OR cryotherapy OR sleep OR bronchiectasis OR elderly OR Hajj OR “cooling kit” OR alcohol OR hyperoxia OR EMG OR war) )

Refined by: DOCUMENT TYPES: ( ARTICLE ) AND LANGUAGES: ( ENGLISH )

Indexes=SCI-EXPANDED, SSCI, A&HCI, CPCI-S, CPCI-SSH, BKCI-S, BKCI-SSH, ESCI, CCR-EXPANDED, IC Timespan=1990-2020
