# Supplementary material for: Acute respiratory illness and return to sport: a systematic review and meta-analysis by a subgroup of the IOC consensus on ‘acute respiratory illness in the athlete’
Source: HighWire-hosted journal article supplement (doi:10.1136/bjsports-2021-104719), 2021-11-17

**Online Supplementary File 3**

Publication statistics- Egger's test and Funnel plots

Figure 2:

Eggers test = intercept =0.47, t=0.26, p=0.802

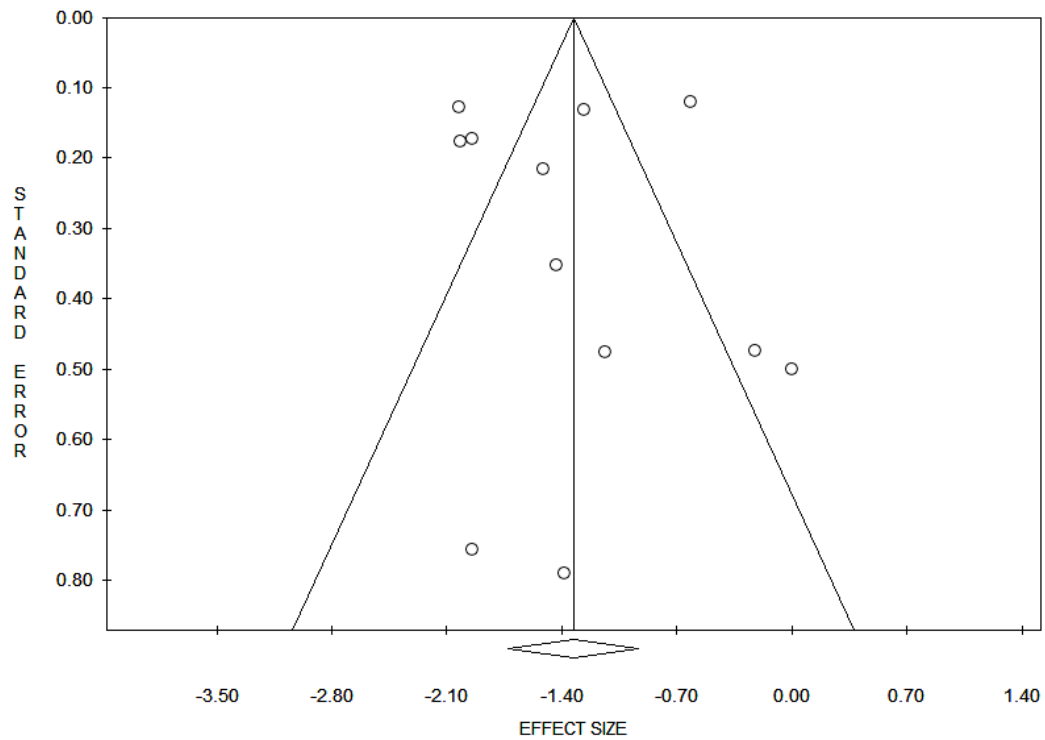

Figure 3:

Eggers test = intercept =0.30, t=0.21, p=0.839

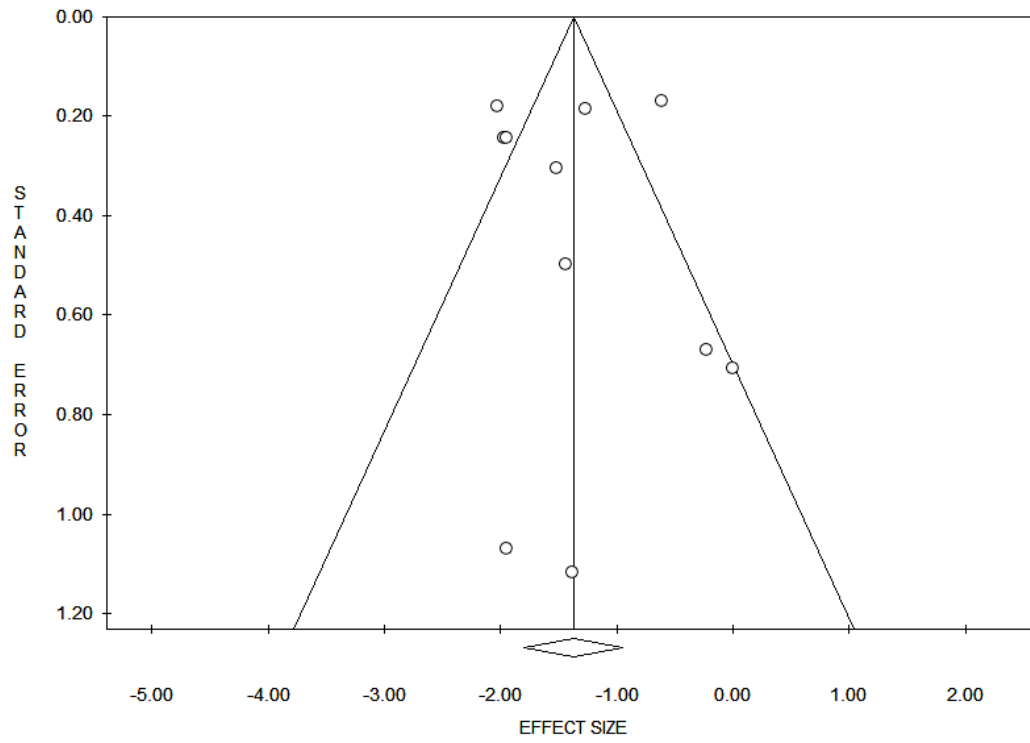

Figure 4

Eggers test = intercept =4.63,  $t=2.26$ ,  $p=0.031$ 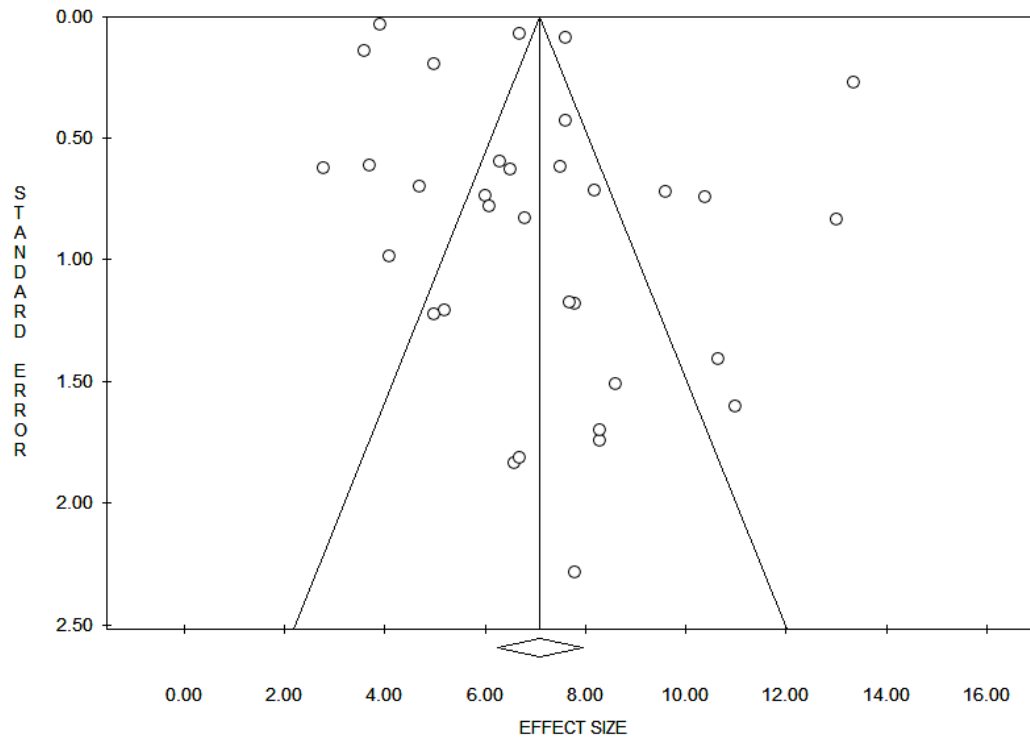

Figure 5:

Eggers test = intercept = 5.36,  $t=2.12$ ,  $p=0.044$ 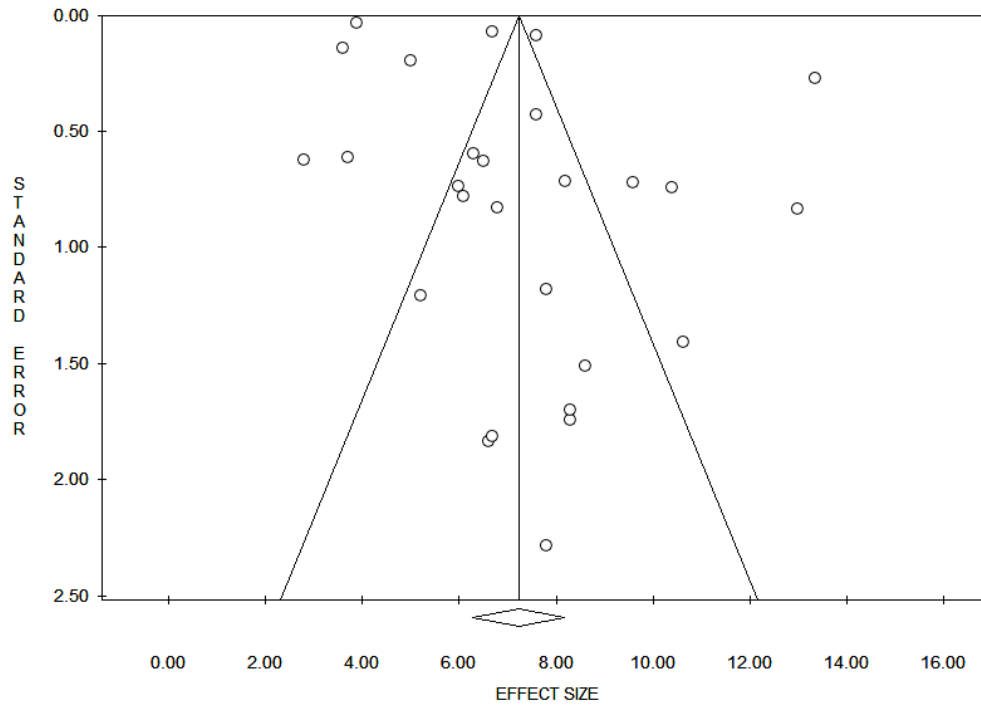

Supplementary Figure 1:

Eggers test = intercept =0.45, t=0.40, p=0.699

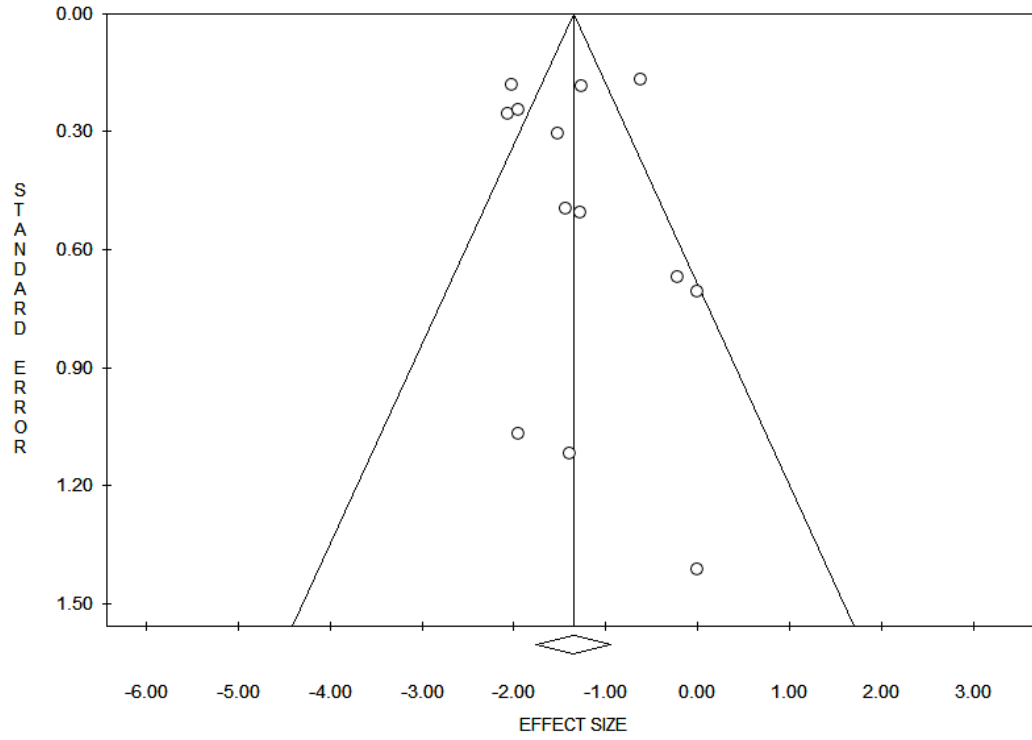

Supplement: bjsports-2021-104719supp004_data_supplement.pdf [file bjsports-2021-104719supp004_data_supplement.pdf]
