# Supplementary material for: Acute respiratory illness and return to sport: a systematic review and meta-analysis by a subgroup of the IOC consensus on ‘acute respiratory illness in the athlete’
Source: HighWire-hosted journal article supplement (doi:10.1136/bjsports-2021-104719), 2021-11-17
Supplement: bjsports-2021-104719supp005_data_supplement.pdf [file bjsports-2021-104719supp005_data_supplement.pdf]

**Supplementary Table A: Summary of articles: data extraction of the demographics**

| Author(s), Year               | Participants (n, sex)            | Age of participants (years) (mean $\pm$ SD)* | Study design **                  | Sport / Sporting Event          | Level of participation                          | Length of surveillance (days) |
|-------------------------------|----------------------------------|----------------------------------------------|----------------------------------|---------------------------------|-------------------------------------------------|-------------------------------|
| Alonso et al (2012)           | n=512 (sex not recorded)         | 26.9 $\pm$ 4.7                               | Prospective                      | 2011 IAAF World Championships   | Recreational / amateur / military               | 9                             |
| Bjørneboe et al (2016)        | n=5070 player-seasons (all male) | Not recorded                                 | Prospective cohort               | Football                        | Elite / professional / international / national | 1 460 (1 261 367 player-days) |
| Chesson et al (2020)          | n=17 (all male)                  | 17.7 $\pm$ 0.7                               | Observational prospective cohort | Rugby (league players)          | Recreational / amateur / military               | 175                           |
| Cox et al (2010)              | n=20 (M=16, F=4)                 | 35.2 $\pm$ 8.4                               | RCT                              | Half-marathon 21.1 km           | Recreational / amateur / military               | 35                            |
| Cox et al (2010) <sup>a</sup> | n=20 (all male)                  | 27.3 $\pm$ 6.4                               | RCT                              | Running                         | Recreational / amateur / military               | 98                            |
| Cox et al (2008) <sup>‡</sup> | n=70 (M=51; F=19)                | 19.3 $\pm$ 2.6                               | Prospective study                | Mixed                           | Elite / professional / international / national | 420                           |
| Cox et al (2004)              | n=20 (all males)                 | 24.6 $\pm$ 3.0                               | RCT                              | Distance Runners                | Elite / professional / international / national | 120                           |
| Cunniffe et al (2011)         | n=31 (all male)                  | 26.5                                         | Prospective                      | Rugby                           | Elite / professional / international / national | 336                           |
| Da Boit et al (2015)          | n=17 (M=9, F=6)                  | 28.3 $\pm$ 6.4                               | RCT                              | General                         | Recreational / amateur / military               | 112                           |
| Davison et al (2020)          | n=61 (sex unknown)               | 39.3 $\pm$ 11.5                              | RCT                              | Endurance athletes              | Recreational / amateur / military               | 90                            |
| Derman et al (2019)           | n=567 (M=433, F=134)             | 32.1 $\pm$ 10.3                              | Prospective                      | Winter Paralympics              | Elite / professional / international / national | 12                            |
| Derman et al (2014)           | n=3329 (sex not recorded)        | Not recorded                                 | Prospective                      | Paralympics                     | Elite / professional / international / national | 14                            |
| Dressendorfer et al (2002)    | n=9 (all males)                  | 24.7 $\pm$ 2.1                               | Prospective                      | Mountain bike cyclists          | Recreational / amateur / military               | 98                            |
| Edouard et al (2015)          | n=528 (sex not recorded)         | 25.3 $\pm$ 4.2                               | Prospective                      | 2013 European Athletics Indoors | Elite / professional / international / national | 4                             |

**Supplementary Table A: Summary of articles: data extraction of the demographics**

|                                   |                           |                                          |                                             |                                       |                                                 |     |
|-----------------------------------|---------------------------|------------------------------------------|---------------------------------------------|---------------------------------------|-------------------------------------------------|-----|
| Edouard et al (2014)              | n=1244 (sex not recorded) | Not recorded                             | Prospective                                 | 2012 European Athletics championships | Elite / professional / international / national | 5   |
| Edouard et al (2013)              | n=440 (sex not recorded)  | 25.2 ± 4.0                               | Prospective                                 | 2011 European Athletics Indoors       | Elite / professional / international / national | 3   |
| Fahlman and Engels (2005)         | n=75 (all male)           | 20.5 ± 1.5                               | Prospective with athlete and control groups | American Football                     | Recreational / amateur / military               | 365 |
| Fricker et al (2005)              | n=20 (all males)          | 24.2 ± 3.1                               | Prospective                                 | Middle-distance runners               | Elite / professional / international / national | 120 |
| Furusawa et al (2007)             | Racers n=21 (all male)    | 42.0 ± 1.74 (Mean ± SE)                  | Prospective cohort                          | Wheelchair marathon racers            | Recreational / amateur                          | 44  |
| Gleeson et al (2012) <sup>a</sup> | n=80 (M=46, F=34)         | 22.5 ± 4.0                               | Prospective                                 | Endurance-based physical activity     | Recreational / amateur / military               | 120 |
| Gleeson et al (2011)              | n=26                      | 25 ± 9                                   | RCT                                         | Endurance athletes                    | Recreational / amateur / military               | 120 |
| Hall et al (2007)                 | n=14 (sex not recorded)   | 24.9 ± 5.8                               | RCT                                         | Active adults                         | Recreational / amateur / military               | 28  |
| Hanstad et al (2011)              | n=99 (M=74, F=25)         | Not recorded                             | Prospective                                 | 2010 Winter Olympics - Norwegian team | Elite / professional / international / national | 19  |
| Haywood et al (2014)              | n=38 (all male)           | 24.7 ± 3.6                               | RCT                                         | Rugby                                 | Elite / professional / international / national | 28  |
| He et al (2014)                   | n=210 (M=147, F=63)       | 20.4 ± 1.9 (male)<br>20.5 ± 3.1 (female) | Prospective cohort                          | Endurance                             | Recreational / amateur / military               | 112 |
| He et al (2013) <sup>a</sup>      | n=31 (sex not recorded)   | 21 ± 2                                   | Prospective cohort                          | Endurance                             | Recreational / amateur / military               | 112 |
| He et al (2013) <sup>b</sup>      | n=225 (sex not recorded)  | 21 ± 3                                   | Prospective cohort                          | Endurance                             | Recreational / amateur / military               | 112 |
| Henson et al (2008)               | n=21 (M=18, F=3)          | 46.0 ± 2.3                               | RCT                                         | Ultra marathon runner                 | Recreational / amateur / military               | 14  |
| Ihalainen et al (2015)            | n=25 (all male)           | 34.6 ± 1.3                               | Prospective cohort                          | Endurance                             | Recreational / amateur / military               | 84  |

**Supplementary Table A: Summary of articles: data extraction of the demographics**

|                                  |                                                                                                 |                                                                                                    |                          |                         |                                                 |      |
|----------------------------------|-------------------------------------------------------------------------------------------------|----------------------------------------------------------------------------------------------------|--------------------------|-------------------------|-------------------------------------------------|------|
| Kekkonen et al (2007)            | n=71 (M=63, F=8)                                                                                | 40<br>Range (23-69)                                                                                | RCT                      | Marathon                | Recreational / amateur / military               | 146  |
| Laaksi et al (2007)              | n=756 (all male)<br>Control subjects (normal Vit D)<br>n=628 (time loss recorded in this group) | Not recorded                                                                                       | Prospective cohort       | Military                | Recreational / amateur / military               | 184  |
| McFarlin et al (2013)            | n=35 (M=20, F=15)                                                                               | 35 ± 11                                                                                            | RCT                      | Marathon runners        | Recreational / amateur / military               | 28   |
| Michalickova et al (2016)        | n=19 (M=14, F=5)                                                                                | 22.8 ± 2.5                                                                                         | RCT                      | Mixed                   | Elite / professional / international / national | 98   |
| Nehlsen-Cannarella et al (2000)  | n=20 (all female)                                                                               | 22.6 + 0.5<br>(Mean ± SEM)                                                                         | Prospective cohort       | Rowers                  | Elite / professional / international / national | 60   |
| Nieman et al 2008                | n=17 (all male)                                                                                 | 25.0 ± 2.2<br>(Mean ± SE)                                                                          | RCT                      | Cyclists                | Recreational / amateur / military               | 35   |
| Nordstrøm et al (2020)           | n=225 (all male)                                                                                | Mean 24<br>Range (17-41)                                                                           | Prospective cohort study | Ice hockey              | Elite / professional / international / national | 210  |
| Orhant et al (2010) <sup>§</sup> | n=81 (all male)                                                                                 | Range (17-34)                                                                                      | Prospective cohort       | Soccer                  | Elite / professional / international / national | 1095 |
| Orysiak et al (2017)             | n=27 (all male)                                                                                 | 16.5 ± 0.5                                                                                         | Prospective cohort       | Ice hockey              | Recreational / amateur / military               | 168  |
| Pacque et al (2007)              | n=17 (M=13, F=4)                                                                                | 41.5 ± 8.2                                                                                         | Prospective cohort       | Ultra endurance running | Recreational / amateur / military               | 28   |
| Peters et al (2004)              | n=19 (all males); fast well trained runners (n=9), slow less trained runners (n=10)             | 35.4 ± 1.84 (fast well trained runners)<br>41.4 ± 2.77 (slow well trained runners)<br>(Mean ± SEM) | Prospective cohort       | Marathon runners        | Recreational / amateur / military               | 14   |
| Pyne et al (2001)                | n=41 (M=21, F=20)                                                                               | Range (15-27)                                                                                      | Prospective              | Swimming                | Elite / professional / international / national | 42   |

**Supplementary Table A: Summary of articles: data extraction of the demographics**

|                                      |                                                                                                 |                                                 |                                |                                     |                                                 |      |
|--------------------------------------|-------------------------------------------------------------------------------------------------|-------------------------------------------------|--------------------------------|-------------------------------------|-------------------------------------------------|------|
| Rama et al (2013)                    | n=19 (M=13, F=6)                                                                                | 17.2 ± 1.3 (male)<br>15.8 ± 0.8 (female)        | Prospective cohort             | Swimming                            | Elite / professional / international / national | 203  |
| Sawczuk et al (2020)                 | n=22 (M=16; F=6)                                                                                | 16.8 ± 0.5                                      | Prospective longitudinal study | Mixed                               | Recreational / amateur / military               | 266  |
| Schwellnus et al (2012) <sup>¥</sup> | n=259 (all male)                                                                                | Not recorded                                    | Prospective cohort             | Rugby                               | Elite / professional / international / national | 112  |
| Soligard et al (2017)                | n=11274 (M=6185, F= 5089)                                                                       | Not recorded                                    | Prospective cohort             | Summer Olympics                     | Elite / professional / international / national | 17   |
| Somerville et al (2019)              | n=12 (M=4, F=8)                                                                                 | 16.5 ± 0.5                                      | RCT                            | Hockey, football, netball           | Recreational / amateur / military               | 63   |
| Somerville et al (2019) <sup>a</sup> | Cohort 2 (school rugby) n=15; cohort 3 (school rugby) n=24, amateur n=18, total n=57 (all male) | Not recorded                                    | Longitudinal cohort            | Rugby                               | Recreational / amateur / military               | 273  |
| Somerville et al (2019) <sup>b</sup> | Professional n=24 (all male)                                                                    | Not recorded                                    | Longitudinal cohort            | Rugby                               | Elite / professional / international / national | 273  |
| Spence et al (2007) <sup>¥</sup>     | n=63 (M=35, F=28)                                                                               | 22.5 ± 3.8 (elite)<br>25.2 ± 3.6 (recreational) | Prospective                    | Triathlon Cycling                   | Elite / professional / international / national | 150  |
| Steffen et al (2019)                 | n=3 984 (M=2002, F=1982)                                                                        | Range (15-18)                                   | Prospective cohort             | Youth Summer Olympics               | Elite / professional / international / national | 13   |
| Stephenson et al (2019)              | n=7 (M=6 male, F=1)                                                                             | 30 ± 10                                         | Prospective cohort             | Para triathletes (mixed impairment) | Elite / professional / international / national | 238  |
| Svendsen et al (2016)                | n=37 (M=22, F=17)                                                                               | >18                                             | Retrospective cohort           | Cross country ski                   | Elite / professional / international / national | 2889 |
| Tiollier et al (2005) <sup>¥</sup>   | n=21 (all male)                                                                                 | 21 ± 2                                          | Prospective cohort             | Military                            | Recreational / amateur / military               | 33   |

**Supplementary Table A: Summary of articles: data extraction of the demographics**

|                                    |                   |                                           |                                 |                          |                                                 |     |
|------------------------------------|-------------------|-------------------------------------------|---------------------------------|--------------------------|-------------------------------------------------|-----|
| Valtonen et al (2019) <sup>‡</sup> | n=44 (M=31, F=13) | 27 ± 6                                    | Prospective observational study | Winter Olympics          | Elite / professional / international / national | 21  |
| West et al (2011)                  | n=50 (M=33; F=17) | 36.4 ± 8.9 (male)<br>35.6 ± 10.2 (female) | RCT                             | Cyclists and triathletes | Recreational / amateur / military               | 105 |

M: Males

F: Females

RCT: Randomised control trial

\* All values are reported as mean + SD unless otherwise stated as range, mean ± SEM, mean ± SE or other as indicated

\*\* In randomised control trials, only the placebo group was used for analysis

‡ Data extracted for subgroups in results table (Online Supplementary Table B)
