# Supplementary material for: Acute respiratory illness and return to sport: a systematic review and meta-analysis by a subgroup of the IOC consensus on ‘acute respiratory illness in the athlete’
Source: HighWire-hosted journal article supplement (doi:10.1136/bjsports-2021-104719), 2021-11-17
Supplement: bjsports-2021-104719supp006_data_supplement.pdf [file bjsports-2021-104719supp006_data_supplement.pdf]

Supplementary Table B: Summary of articles: data extraction by classification and outcomes

| Author(s),<br>Year        | Classification                                                                            |                                |                                   | Outcomes                                                                                                           |                                          |                                                        |                                                                      |                                                                   |                                                                |                                                                                                                                |
|---------------------------|-------------------------------------------------------------------------------------------|--------------------------------|-----------------------------------|--------------------------------------------------------------------------------------------------------------------|------------------------------------------|--------------------------------------------------------|----------------------------------------------------------------------|-------------------------------------------------------------------|----------------------------------------------------------------|--------------------------------------------------------------------------------------------------------------------------------|
|                           | Method of<br>diagnosis                                                                    | Pathological<br>classification | Anatomical<br>classification      | Total number<br>ARill/ARinf,<br>number of<br>ARill episodes<br>or number of<br>participants<br>with<br>ARill/ARinf | Time Loss<br>ARill (>1<br>day) (n;<br>%) | Days lost per<br>ARill (days<br>and mean $\pm$<br>SD)* | Days lost<br>(total days<br>lost/ illness<br>and total<br>illnesses) | Symptom<br>duration in<br>days (mean $\pm$<br>SD or<br>average) * | Duration of<br>symptoms<br>(days and<br>number of<br>athletes) | Other<br>outcomes                                                                                                              |
| Alonso et al<br>(2012)    | Physician<br>(diagnosis by<br>history and<br>clinical<br>examination)                     | Suspected<br>ARinf             | Upper<br>ARill/ARinf              | Total upper<br>ARill n=49<br>Upper ARinf<br>n=23                                                                   | n=5 (5/23)<br>21% of<br>upper ARinf      |                                                        |                                                                      |                                                                   |                                                                |                                                                                                                                |
| Bjørneboe<br>et al (2016) | Physician<br>(diagnosis by<br>history and<br>clinical<br>examination)                     | Undiagnosed<br>ARill           | General<br>(upper/lower)<br>ARill | ARill episodes<br>n=1110                                                                                           |                                          |                                                        |                                                                      |                                                                   |                                                                | Illness<br>burden 3.2<br>absence<br>days/1000<br>player-days                                                                   |
| Chesson et al<br>(2020)   | Self-reported<br>symptoms<br>only                                                         | Undiagnosed<br>ARill           | General<br>(upper/lower)<br>ARill | ARill n=15                                                                                                         |                                          | Time loss<br>(days) due to<br>ARill n=12<br>days       |                                                                      |                                                                   |                                                                | Total days<br>lost due to all<br>illness n=19.<br>Total days<br>lost to ARill<br>n=12 (63.2%<br>of all time<br>loss illnesses) |
| Cox et al<br>(2010)       | Self-reported<br>symptoms<br>with checklist<br>and algorithm<br>to diagnose<br>infections | Undiagnosed<br>ARill           | Upper ARill                       | Upper ARill<br>n=14                                                                                                |                                          |                                                        |                                                                      | 4.1 $\pm$ 3.7                                                     |                                                                |                                                                                                                                |

**Supplementary Table B: Summary of articles: data extraction by classification and outcomes**

|                               |                                                                          |                   |                             |                                                                                         |  |  |  |                              |                           |                                                                                                           |
|-------------------------------|--------------------------------------------------------------------------|-------------------|-----------------------------|-----------------------------------------------------------------------------------------|--|--|--|------------------------------|---------------------------|-----------------------------------------------------------------------------------------------------------|
| Cox et al (2010) <sup>a</sup> | Self-reported symptoms with physician check (no examination)             | Suspected ARinf   | General (upper/lower) ARinf | ARinf episodes n=9                                                                      |  |  |  | Mean 8 (Range not specified) | Total days all ARinf n=72 |                                                                                                           |
| Cox et al (2008) <sup>a</sup> | Physician diagnosis including pathology confirmed (PCR/culture/serology) | Confirmed ARinf   | Upper ARill/ARinf           | All upper ARill episodes n=70 (confirmed upper ARinf pathogen identified n=21/70 (30%)) |  |  |  | 6.8 ± 3.8                    |                           | 50% of the athletes modified, 31% ceased all training, and 19% reduced their training volume or intensity |
| Cox et al (2008) <sup>b</sup> | Physician (diagnosis by history and clinical examination)                | Suspected ARinf   | Upper ARinf                 | Suspected upper ARinf (PCR negative but abnormal blood results) n=19/70 (27%)           |  |  |  | 6.1 ± 3.4                    |                           |                                                                                                           |
| Cox et al (2008) <sup>c</sup> | Physician (diagnosis by history and clinical examination)                | Undiagnosed ARill | Upper ARill                 | Undiagnosed ARill n=30/70 (43%)                                                         |  |  |  | 7.5 ± 3.4                    |                           |                                                                                                           |
| Cox et al (2004)              | Self-reported symptoms with physician check (no examination)             | Suspected ARinf   | Upper ARinf                 | Upper ARinf n=6 in placebo month                                                        |  |  |  | Mean 5 Range (2-14)          |                           |                                                                                                           |

**Supplementary Table B: Summary of articles: data extraction by classification and outcomes**

|                            |                                                                            |                   |                             |                                              |                                               |                                                                         |  |                          |  |                                                                          |
|----------------------------|----------------------------------------------------------------------------|-------------------|-----------------------------|----------------------------------------------|-----------------------------------------------|-------------------------------------------------------------------------|--|--------------------------|--|--------------------------------------------------------------------------|
| Cunniffe et al (2011)      | Self-reported symptoms with physician check (no examination)               | Undiagnosed ARill | Upper ARill                 | Upper ARill n=123                            |                                               |                                                                         |  | Mean 4.7<br>Range (2-33) |  | In all ARill, 14% reported reduced activity, 8.6% felt need to go to bed |
| Da Boit et al (2015)       | Self-reported symptoms with checklist and algorithm to diagnose infections | Suspected ARinf   | Upper ARinf                 | Upper ARinf n=8                              |                                               |                                                                         |  | 2.79 ± 1.76              |  |                                                                          |
| Davison et al (2020)       | Self-reported symptoms with checklist and algorithm to diagnose infections | Suspected ARinf   | Upper ARinf                 | Total upper ARinf n=130 episodes             |                                               | Days lost 3.5 ± 5.0                                                     |  | 10.4 ± 8.5               |  | Reduced training 3.4 ± 5.1 (Mean ± SD)                                   |
| Derman et al (2019)        | Physician (diagnosis by history and clinical examination)                  | Undiagnosed ARill | General (upper/lower) ARill | All ARill n=28                               |                                               | Days lost n=9                                                           |  |                          |  |                                                                          |
| Derman et al (2014)        | Physician (diagnosis by history and clinical examination)                  | Undiagnosed ARill | General (upper/lower) ARill | All ARill n=152                              | n=19 (19/152) 12.5% of all ARill              |                                                                         |  |                          |  |                                                                          |
| Dressendorfer et al (2002) | Physician (diagnosis by history and clinical examination)                  | Suspected ARinf   | Upper ARinf                 | Upper ARinf n=4 (including 1 case influenza) | n=1 (influenza case) (1/5) 20% of upper ARinf | Influenza time loss days n=7 days; other upper ARinf time loss days n=0 |  |                          |  |                                                                          |

**Supplementary Table B: Summary of articles: data extraction by classification and outcomes**

|                           |                                                           |                 |             |                                                                                                       |                                     |  |  |                          |  |                                                                                         |
|---------------------------|-----------------------------------------------------------|-----------------|-------------|-------------------------------------------------------------------------------------------------------|-------------------------------------|--|--|--------------------------|--|-----------------------------------------------------------------------------------------|
| Edouard et al (2015)      | Physician (diagnosis by history and clinical examination) | Suspected ARinf | Upper ARinf | Upper ARinf n=8                                                                                       | n=4 (4/8)<br>50% of all upper ARinf |  |  |                          |  |                                                                                         |
| Edouard et al (2014)      | Physician (diagnosis by history and clinical examination) | Suspected ARinf | Upper ARinf | Upper ARinf n=9                                                                                       | n=4 (4/9)<br>44% of upper ARinf     |  |  |                          |  | Upper ARinf time loss n=4, all time-loss illness n=6 (66.7% of all time loss illnesses) |
| Edouard et al (2013)      | Physician (diagnosis by history and clinical examination) | Suspected ARinf | Upper ARinf | Upper ARinf n=8                                                                                       | n=1 (1/8)<br>12.5% of upper ARinf   |  |  |                          |  |                                                                                         |
| Fahlman and Engels (2005) | Physician (diagnosis by history and clinical examination) | Suspected ARinf | Upper ARinf | Upper ARinf n=174                                                                                     |                                     |  |  | 13.3 ± 3.6               |  |                                                                                         |
| Fricker et al (2005)      | Physician (diagnosis by history and clinical examination) | Suspected ARinf | Upper ARinf | 15 athletes reported at least one episode of upper ARinf with mean number of episodes 2.5 (range 1-5) |                                     |  |  | Mean 8.3<br>Range (2-44) |  |                                                                                         |

**Supplementary Table B: Summary of articles: data extraction by classification and outcomes**

|                                   |                                                                            |                 |             |                                                                                    |  |  |  |                       |  |                                                                                 |
|-----------------------------------|----------------------------------------------------------------------------|-----------------|-------------|------------------------------------------------------------------------------------|--|--|--|-----------------------|--|---------------------------------------------------------------------------------|
| Furusawa et al (2007)             | Self-reported symptoms with checklist and algorithm to diagnose infections | Suspected ARinf | Upper ARinf | Number of racers with ARinf symptoms n=8 ("throughout experiment") n=4 (post-race) |  |  |  |                       |  |                                                                                 |
| Gleeson et al (2012) <sup>a</sup> | Self-reported symptoms with checklist and algorithm to diagnose infections | Suspected ARinf | Upper ARinf | At least one week with upper ARinf n=50, ≥3 weeks with upper ARinf n=24            |  |  |  | 3.6 ± 1.0             |  |                                                                                 |
| Gleeson et al (2011)              | Self-reported symptoms with checklist and algorithm to diagnose infections | Suspected ARinf | Upper ARinf | Number of ARinf episodes 2.1 ± 1.2 (Mean ± SD)                                     |  |  |  | 7.6 ± 3.2             |  |                                                                                 |
| Hall et al (2007)                 | Self-reported symptoms with checklist and algorithm to diagnose infections | Suspected ARinf | Upper ARinf | Upper ARinf n=7                                                                    |  |  |  | 8.6 ± 1.5 (Mean ± SE) |  |                                                                                 |
| Hanstad et al (2011)              | Physician (diagnosis by history and clinical examination)                  | Suspected ARinf | Upper ARinf | Total ARinf n=4; Infectious mononucleosis n=1, Upper ARinf n=3                     |  |  |  |                       |  | n=1 did not compete, n=2 missed one competition, n=1 missed a relay for example |

**Supplementary Table B: Summary of articles: data extraction by classification and outcomes**

|                              |                                                                            |                 |             |                                                      |  |  |  |                                                                                                                                                                                                                       |  |                                                                                                                  |
|------------------------------|----------------------------------------------------------------------------|-----------------|-------------|------------------------------------------------------|--|--|--|-----------------------------------------------------------------------------------------------------------------------------------------------------------------------------------------------------------------------|--|------------------------------------------------------------------------------------------------------------------|
| Haywood et al (2014)         | Self-reported symptoms with checklist and algorithm to diagnose infections | Suspected ARinf | Upper ARinf | Players with upper ARinf symptoms<br>n=19            |  |  |  | 6.7 ± 7.9                                                                                                                                                                                                             |  |                                                                                                                  |
| He et al (2014)              | Self-reported symptoms with checklist and algorithm to diagnose infections | Suspected ARinf | Upper ARinf | Upper ARinf symptoms<br>n=92                         |  |  |  | 11.6 ± 6.8<br>(males)<br>15.5 ± 9.3<br>(females)<br>Mean 13 (all)                                                                                                                                                     |  |                                                                                                                  |
| He et al (2013) <sup>a</sup> | Self-reported symptoms with checklist and algorithm to diagnose infections | Suspected ARinf | Upper ARinf | Number of ARinf episodes<br>1.0 ± 1.1<br>(Mean ± SD) |  |  |  | 8.2 ± 4.0                                                                                                                                                                                                             |  |                                                                                                                  |
| He et al (2013) <sup>b</sup> | Self-reported symptoms with checklist and algorithm to diagnose infections | Suspected ARinf | Upper ARinf | Participant with ≥ 1 episode of upper ARinf<br>n=103 |  |  |  | Mean 5<br>Range (5-7)<br>(optimal Vit D<br>n=3)<br>Mean 8<br>Range (6-9)<br>(adequate Vit<br>D n=56)<br>Mean 8 Range<br>(5-14)<br>(inadequate<br>Vit D n=27)<br>Mean 13<br>Range (10-17)<br>(deficient Vit<br>D n=12) |  | Training negatively affected in 70% of athletes with upper ARinf and training load reduced by an average of 24%. |

**Supplementary Table B: Summary of articles: data extraction by classification and outcomes**

|                           |                                                                            |                   |                             |                                       |  |                                         |  |                                                               |                                           |                                                        |
|---------------------------|----------------------------------------------------------------------------|-------------------|-----------------------------|---------------------------------------|--|-----------------------------------------|--|---------------------------------------------------------------|-------------------------------------------|--------------------------------------------------------|
| Henson et al (2008)       | Self-reported symptoms with checklist and algorithm to diagnose infections | Suspected ARinf   | Upper ARinf                 | Upper ARinf n=5                       |  |                                         |  |                                                               | Total sick days n=29 (for 5 ill athletes) |                                                        |
| Ihalainen et al (2015)    | Self-reported symptoms only                                                | Undiagnosed ARill | Upper ARill                 | Episodes of upper ARill symptoms n=19 |  |                                         |  | 11 ± 7                                                        |                                           |                                                        |
| Kekkonen et al (2007)     | Self-reported symptoms only                                                | Suspected ARinf   | UpperARinf                  | Upper ARinf n=28                      |  |                                         |  | 6.3 ± 4.3 (training group)<br>4.2 ± 2.2 (post-marathon group) |                                           |                                                        |
| Laaksi et al (2007)       | Physician (diagnosis by history and clinical examination)                  | Suspected ARinf   | General (upper/lower) ARinf |                                       |  | Median: 2;<br>Q1-Q3: 0–4                |  |                                                               |                                           |                                                        |
| McFarlin et al (2013)     | Self-reported symptoms only                                                | Suspected ARinf   | Upper ARinf                 |                                       |  |                                         |  | 3.9 ± 0.2                                                     |                                           |                                                        |
| Michalickova et al (2016) | Self-reported symptoms with checklist and algorithm to diagnose infections | Suspected ARinf   | Upper ARinf                 | Athletes with upper ARinf n=11        |  | Total days without training n=1.7 ± 2.3 |  | 10.6 ± 4.7                                                    | Infected days n=132 in 11 athletes        | Proportion of athletes reporting impaired training 42% |

**Supplementary Table B: Summary of articles: data extraction by classification and outcomes**

|                                  |                                                                            |                   |                             |                   |                                        |                |                                                          |                                |                                         |                                                                       |
|----------------------------------|----------------------------------------------------------------------------|-------------------|-----------------------------|-------------------|----------------------------------------|----------------|----------------------------------------------------------|--------------------------------|-----------------------------------------|-----------------------------------------------------------------------|
| Nehlsen-Cannarella et al (2000)  | Self-reported symptoms with checklist and algorithm to diagnose infections | Suspected ARinf   | Upper ARinf                 |                   |                                        |                |                                                          | 5.2 ± 1.2 (Mean ± SE)          |                                         |                                                                       |
| Nieman et al 2008                | Self-reported symptoms with checklist and algorithm to diagnose infections | Suspected ARinf   | Upper ARinf                 | Upper ARinf n=6   |                                        |                |                                                          | 3.7 ± 0.6 (Mean ± SE)          |                                         |                                                                       |
| Nordstrøm et al (2020)           | Self-reported symptoms only                                                | Undiagnosed ARill | General (upper/lower) ARill | All ARill n=151   | n=53 (53/151) 35.1% of ARill           |                | ARill total days lost n=280, total number of ARill n=151 |                                |                                         | Total days lost due to ARill n=280 (59.8% of all time loss illnesses) |
| Orhant et al (2010) <sup>a</sup> | Physician (diagnosis by history and clinical examination)                  | Suspected ARinf   | Upper ARinf                 | Upper ARinf n=151 | n=17 (17/151) 11.3% of all upper ARinf | Days lost n=34 | Days lost per episode 2.0                                | Mean 3.1 (Range not specified) |                                         |                                                                       |
| Orhant et al (2010) <sup>b</sup> | Physician (diagnosis by history and clinical examination)                  | Suspected ARinf   | Lower ARinf                 | Lower ARinf n=4   | n=2 (2/4) 50% of all lower ARinf       | Days lost n=5  | Days lost per episode 2.5                                | Mean 4.8 (Range not specified) |                                         |                                                                       |
| Orysiak et al (2017)             | Self-reported symptoms with checklist and algorithm to diagnose infections | Suspected ARinf   | Upper ARinf                 | Upper ARinf n=59  |                                        |                |                                                          | 6.3 ± 4.6                      | Total symptom days n=427 in 27 athletes |                                                                       |



**Supplementary Table B: Summary of articles: data extraction by classification and outcomes**

|                                      |                                                                            |                   |                             |                                                                           |                                                              |  |  |                                                               |                                                     |  |
|--------------------------------------|----------------------------------------------------------------------------|-------------------|-----------------------------|---------------------------------------------------------------------------|--------------------------------------------------------------|--|--|---------------------------------------------------------------|-----------------------------------------------------|--|
| Pacque et al (2007)                  | Self-reported symptoms with checklist and algorithm to diagnose infections | Suspected ARinf   | Upper ARinf                 | Upper ARinf: Pre-race n=4, post-race n=3                                  |                                                              |  |  | Average 8.5 (pre-race period)<br>Average 6 (post-race period) | Total symptom days n=34 (pre-race) n=18 (post-race) |  |
| Peters et al (2004)                  | Self-reported symptoms with checklist and algorithm to diagnose infections | Suspected ARinf   | Upper ARinf                 | Upper ARinf<br>Fast well trained (FWT) n=5<br>Slow less trained (SLT) n=4 |                                                              |  |  | Average 4.3 (FWT)<br>Average 3.5 (SLT)                        |                                                     |  |
| Pyne et al (2001)                    | Physician (diagnosis by history and clinical examination)                  | Undiagnosed ARill | General (upper/lower) ARill | ARill n=18                                                                |                                                              |  |  | Median 4<br>Range (1-21)                                      |                                                     |  |
| Rama et al (2013)                    | Self-reported symptoms with checklist and algorithm to diagnose infections | Suspected ARinf   | Upper ARinf                 | Episodes of upper ARinf n=31 in 19 athletes                               |                                                              |  |  | 6.7 ± 0.4                                                     |                                                     |  |
| Sawczuk et al (2020)                 | Self-reported symptoms only                                                | Suspected ARinf   | Upper ARinf                 | Upper ARinf episodes n=45                                                 |                                                              |  |  | 17 ± 18                                                       |                                                     |  |
| Schwellnus et al (2012) <sup>a</sup> | Physician (diagnosis by history and clinical examination)                  | Suspected ARinf   | General (upper/lower) ARinf | All ARinf n=98                                                            | Estimated time loss ARinf n=18 (18/98)<br>18.4% of all ARinf |  |  |                                                               |                                                     |  |

**Supplementary Table B: Summary of articles: data extraction by classification and outcomes**

|                                      |                                                                            |                   |                             |                                                                            |                                                  |  |  |                                                                                                                                        |  |  |
|--------------------------------------|----------------------------------------------------------------------------|-------------------|-----------------------------|----------------------------------------------------------------------------|--------------------------------------------------|--|--|----------------------------------------------------------------------------------------------------------------------------------------|--|--|
| Schwellnus et al (2012) <sup>b</sup> | Physician (diagnosis by history and clinical examination)                  | Suspected ARinf   | Upper ARill/ARinf           | Upper ARill n=72                                                           | Upper ARinf n=13 (13/72)<br>18.1% of upper ARill |  |  |                                                                                                                                        |  |  |
| Soligard et al (2017)                | Physician (diagnosis by history and clinical examination)                  | Undiagnosed ARill | General (upper/lower) ARill | All ARill n=292                                                            | ARill n=54 (54/292)<br>18.5% of all ARill        |  |  |                                                                                                                                        |  |  |
| Somerville et al (2019)              | Self-reported symptoms with checklist and algorithm to diagnose infections | Suspected ARinf   | Upper ARinf                 | Upper ARinf n=12                                                           |                                                  |  |  | Average 12.3                                                                                                                           |  |  |
| Somerville et al (2019) <sup>a</sup> | Self-reported symptoms with checklist and algorithm to diagnose infections | Suspected ARinf   | Upper ARinf                 | Number of subjects with ARinf in cohort 2 n=8, cohort 3 n=17, amateurs n=6 |                                                  |  |  | Mean upper ARinf duration per 1000 non-illness days<br>59.6 ± 183.2 (cohort 2)<br>522.1 ± 1138.8 (cohort 3)<br>64.3 ± 173.9 (amateurs) |  |  |
| Somerville et al (2019) <sup>b</sup> | Self-reported symptoms with checklist and algorithm to diagnose infections | Suspected ARinf   | Upper ARinf                 | Number of subject with ARinf in professional cohort n=12                   |                                                  |  |  | Mean Upper ARinf duration per 1000 non-illness days<br>32.6 ± 59.7 (professionals)                                                     |  |  |

**Supplementary Table B: Summary of articles: data extraction by classification and outcomes**

|                                  |                                                                            |                   |                             |                                         |                            |  |  |           |  |                                                                                                                                                                                           |
|----------------------------------|----------------------------------------------------------------------------|-------------------|-----------------------------|-----------------------------------------|----------------------------|--|--|-----------|--|-------------------------------------------------------------------------------------------------------------------------------------------------------------------------------------------|
| Spence et al (2007) <sup>a</sup> | Physician diagnosis including pathology confirmed (PCR/culture/serology)   | Confirmed ARinf   | Upper ARinf                 | All athletes confirmed ARinf n=9        |                            |  |  | 9.6 ± 2.4 |  | Rhinovirus most common pathogen isolated. Symptom and functional impairment severity scores were higher in subjects with an infectious pathogen episode, particularly on illness days 3–4 |
| Spence et al (2007) <sup>b</sup> | Physician (diagnosis by history and clinical examination)                  | Suspected ARinf   | Upper ARinf                 | All athletes suspected upper ARinf n=19 |                            |  |  | 6.5 ± 3.2 |  |                                                                                                                                                                                           |
| Steffen et al (2019)             | Physician (diagnosis by history and clinical examination)                  | Undiagnosed ARill | General (upper/lower) ARill | All ARill n=168                         | n=37 (37/168) 22% of ARill |  |  |           |  | Time loss ARill n=37, all illness time loss n=66 (56.1% of all time loss illness)                                                                                                         |
| Stephenson et al (2019)          | Self-reported symptoms with checklist and algorithm to diagnose infections | Suspected ARinf   | Upper ARinf                 | Upper ARinf n=22                        |                            |  |  |           |  | During 50% of upper ARinf episodes, athletes had to reduce or                                                                                                                             |

**Supplementary Table B: Summary of articles: data extraction by classification and outcomes**

|                                    |                                                                            |                 |                             |                                                                                                |  |  |  |                         |  |                  |
|------------------------------------|----------------------------------------------------------------------------|-----------------|-----------------------------|------------------------------------------------------------------------------------------------|--|--|--|-------------------------|--|------------------|
|                                    |                                                                            |                 |                             |                                                                                                |  |  |  |                         |  | suspend training |
| Svensden et al (2016)              | Self-reported symptoms with checklist and algorithm to diagnose infections | Suspected ARinf | General (upper/lower) ARinf | All ARinf n=410                                                                                |  |  |  | 5 ± 4                   |  |                  |
| Tiollier et al (2005) <sup>a</sup> | Physician (diagnosis by history and clinical examination)                  | Suspected ARinf | Upper ARinf                 | Upper ARinf episodes n=16 (upper ARinf symptoms recorded n=30: rhinopharyngitis n=12/30 (40%)) |  |  |  | 7.6 ± 1.2 (Mean ± SEM)  |  |                  |
| Tiollier et al (2005) <sup>a</sup> | Physician (diagnosis by history and clinical examination)                  | Suspected ARinf | Upper ARinf                 | Upper ARinf (tonsillitis) n=5/30 (17%)                                                         |  |  |  | 8.2 ± 3.8 (Mean ± SEM)  |  |                  |
| Tiollier et al (2005) <sup>a</sup> | Physician (diagnosis by history and clinical examination)                  | Suspected ARinf | Upper ARinf                 | Upper ARinf (sinusitis) n=4/30 (13%)                                                           |  |  |  | 10.7 ± 4.8 (Mean ± SEM) |  |                  |
| Tiollier et al (2005) <sup>a</sup> | Physician (diagnosis by history and clinical examination)                  | Suspected ARinf | Upper ARinf                 | Upper ARinf (otitis media) n=3/30 (10%)                                                        |  |  |  | 4.3 ± 0.9 (Mean ± SEM)  |  |                  |

**Supplementary Table B: Summary of articles: data extraction by classification and outcomes**

|                                    |                                                                          |                 |             |                                                            |  |  |  |                        |  |                                                                           |
|------------------------------------|--------------------------------------------------------------------------|-----------------|-------------|------------------------------------------------------------|--|--|--|------------------------|--|---------------------------------------------------------------------------|
| Tiollier et al (2005) <sup>b</sup> | Physician (diagnosis by history and clinical examination)                | Suspected ARinf | Lower ARinf | Lower ARinf (bronchitis) n=6/30 (20%)                      |  |  |  | 7.8 ± 2.3 (Mean ± SEM) |  |                                                                           |
| Valtonen et al (2019)              | Physician diagnosis including pathology confirmed (PCR/culture/serology) | Confirmed ARinf | Upper ARinf | Upper ARinf (athletes with symptoms of “common cold”) n=20 |  |  |  | 8.3 ± 7.8              |  | Only one athlete lost competition on 1 day due to a respiratory infection |
| Valtonen et al (2019)              | Physician diagnosis including pathology confirmed (PCR/culture/serology) | Confirmed ARinf | Upper ARinf | Coronavirus 229E n=2                                       |  |  |  | 13.5 ± 16.3            |  |                                                                           |
| Valtonen et al (2019)              | Physician diagnosis including pathology confirmed (PCR/culture/serology) | Confirmed ARinf | Upper ARinf | Influenza B n=1                                            |  |  |  | 7.0                    |  |                                                                           |
| Valtonen et al (2019)              | Physician diagnosis including pathology confirmed (PCR/culture/serology) | Confirmed ARinf | Upper ARinf | Respiratory syncytial virus (RSV) A n=4                    |  |  |  | 8.7 ± 3.2              |  |                                                                           |

**Supplementary Table B: Summary of articles: data extraction by classification and outcomes**

|                       |                                                                          |                 |             |                                         |  |  |  |             |  |  |
|-----------------------|--------------------------------------------------------------------------|-----------------|-------------|-----------------------------------------|--|--|--|-------------|--|--|
| Valtonen et al (2019) | Physician diagnosis including pathology confirmed (PCR/culture/serology) | Confirmed ARinf | UpperARinf  | Rhinovirus n=1                          |  |  |  | 2.0         |  |  |
| Valtonen et al (2019) | Physician diagnosis including pathology confirmed (PCR/culture/serology) | Confirmed ARinf | Upper ARinf | Metapneumo virus n=4                    |  |  |  | 4.0 ± 1.7   |  |  |
| Valtonen et al (2019) | Physician diagnosis including pathology confirmed (PCR/culture/serology) | Confirmed ARinf | Upper ARinf | Coronavirus NL63 n=1                    |  |  |  | 3.0         |  |  |
| Valtonen et al (2019) | Physician diagnosis including pathology confirmed (PCR/culture/serology) | Confirmed ARinf | Upper ARinf | Coronavirus OC43 n=2                    |  |  |  | 18.0 ± 11.3 |  |  |
| Valtonen et al (2019) | Physician diagnosis including pathology confirmed (PCR/culture/serology) | Confirmed ARinf | Upper ARinf | Respiratory syncytial virus (RSV) B n=1 |  |  |  | 7.0         |  |  |

**Supplementary Table B: Summary of articles: data extraction by classification and outcomes**

|                       |                                                                            |                 |             |                 |  |  |  |                                            |  |  |
|-----------------------|----------------------------------------------------------------------------|-----------------|-------------|-----------------|--|--|--|--------------------------------------------|--|--|
| Valtonen et al (2019) | Physician diagnosis including pathology confirmed (PCR/culture/serology)   | Confirmed ARinf | Upper ARinf | Influenza A n=1 |  |  |  | 3.0                                        |  |  |
| West et al (2011)     | Self-reported symptoms with checklist and algorithm to diagnose infections | Suspected ARinf | Lower ARinf |                 |  |  |  | 7.4 ± 10.3 (males)<br>5.1 ± 14.7 (females) |  |  |

ARill: Acute respiratory illness

ARinf: Acute respiratory infection

\* Values are mean ± standard deviation (SD) unless stated differently
