# Supplementary material for: Acute respiratory illness and return to sport: a systematic review and meta-analysis by a subgroup of the IOC consensus on ‘acute respiratory illness in the athlete’
Source: HighWire-hosted journal article supplement (doi:10.1136/bjsports-2021-104719), 2021-11-17
Supplement: bjsports-2021-104719supp007_data_supplement.pdf [file bjsports-2021-104719supp007_data_supplement.pdf]

**Online Supplementary Table C: Modified Downs and Black and Oxford Level of Evidence**

| Author(s), Year                   | Modified Downs and Black (score out of 13) | Oxford Level of Evidence |
|-----------------------------------|--------------------------------------------|--------------------------|
| Alonso et al (2012)               | 12                                         | 2b                       |
| Bjørneboe et al (2016)            | 11                                         | 1b                       |
| Chesson et al (2020)              | 10                                         | 1b                       |
| Cox et al (2010)                  | 11                                         | 1b                       |
| Cox et al (2010) <sup>a</sup>     | 11                                         | 1b                       |
| Cox et al (2008)                  | 10                                         | 2b                       |
| Cox et al (2004)                  | 10                                         | 1b                       |
| Cunniffe et al (2011)             | 11                                         | 2b                       |
| Da Boit et al (2015)              | 11                                         | 1b                       |
| Davison et al (2020)              | 10                                         | 2b                       |
| Derman et al (2019)               | 12                                         | 2b                       |
| Derman et al (2014)               | 12                                         | 2b                       |
| Dressendorfer et al (2002)        | 9                                          | 2b                       |
| Edouard et al (2015)              | 13                                         | 2b                       |
| Edouard et al (2014)              | 12                                         | 2b                       |
| Edouard et al (2013)              | 12                                         | 2b                       |
| Fahlman and Engels (2005)         | 12                                         | 2b                       |
| Fricker et al (2005)              | 10                                         | 2b                       |
| Furusawa et al (2007)             | 9                                          | 3b                       |
| Gleeson et al (2012) <sup>a</sup> | 10                                         | 2b                       |
| Gleeson et al (2011)              | 10                                         | 1b                       |
| Hall et al (2007)                 | 10                                         | 1b                       |
| Hanstad et al (2011)              | 12                                         | 2b                       |
| Haywood et al (2014)              | 10                                         | 1b                       |

**Online Supplementary Table C: Modified Downs and Black and Oxford Level of Evidence**

|                                      |    |    |
|--------------------------------------|----|----|
| He et al (2014)                      | 10 | 1b |
| He et al (2013) <sup>a</sup>         | 11 | 1b |
| He et al (2013) <sup>b</sup>         | 11 | 2b |
| Henson et al (2008)                  | 10 | 1b |
| Ihalainen et al (2015)               | 10 | 2b |
| Kekkonen et al (2007)                | 12 | 1b |
| Laaksi et al (2007)                  | 12 | 1b |
| McFarlin et al (2013)                | 10 | 1b |
| Michalickova et al (2016)            | 9  | 1b |
| Nehlsen-Cannarella et al (2000)      | 11 | 2b |
| Nieman et al 2008                    | 7  | 2b |
| Nordstrøm et al (2020)               | 12 | 2b |
| Orhant et al (2010)                  | 8  | 2b |
| Orysiak et al (2017)                 | 11 | 2b |
| Pacque et al (2007)                  | 12 | 2b |
| Peters et al (2004)                  | 10 | 2b |
| Pyne et al (2001)                    | 12 | 2b |
| Rama et al (2013)                    | 10 | 3b |
| Sawczuk et al (2020)                 | 10 | 2b |
| Schwellnus et al (2012)              | 10 | 2b |
| Soligard et al (2017)                | 12 | 2b |
| Somerville et al (2019)              | 11 | 2b |
| Somerville et al (2019) <sup>a</sup> | 10 | 2b |
| Spence et al (2007)                  | 10 | 1b |
| Steffen et al (2019)                 | 11 | 2b |
| Stephenson et al (2019)              | 10 | 3b |

**Online Supplementary Table C: Modified Downs and Black and Oxford Level of Evidence**

|                       |    |    |
|-----------------------|----|----|
| Svendsen et al (2016) | 11 | 2b |
| Tiollier et al (2005) | 10 | 2b |
| Valtonen et al (2019) | 12 | 1b |
| West et al (2011)     | 10 | 1b |

**Online Supplementary Table C: Modified Downs and Black and Oxford Level of Evidence**

|                        |                          | Modified Downs and Black   |                         |                                       |                         |                                     |                                               |                           |                                                               |                                                                |                                                                      |                        |                                 |                                                                                                 |       |
|------------------------|--------------------------|----------------------------|-------------------------|---------------------------------------|-------------------------|-------------------------------------|-----------------------------------------------|---------------------------|---------------------------------------------------------------|----------------------------------------------------------------|----------------------------------------------------------------------|------------------------|---------------------------------|-------------------------------------------------------------------------------------------------|-------|
| Author, year           | Oxford Level of Evidence | Reporting<br>Yes=1 No=0    |                         |                                       |                         |                                     |                                               |                           | External validity<br>Yes = 1 No = 0<br>Unable to determine= 0 |                                                                | Internal validity - bias<br>Yes = 1 No = 0<br>Unable to determine= 0 |                        |                                 | Internal validity - confounding (selection bias)<br>Yes = 1<br>No = 0<br>Unable to determine= 0 |       |
|                        |                          | Hypothesis / aim described | Main outcomes described | Characteristics of patients described | Main findings described | Estimates of the random variability | Characteristics of patients lost to follow-up | Actual probability values | Subjects recruited representative of the entire population    | Subjects participating representative of the entire population | Data dredging reported (if applicable)                               | Statistical tests used | Outcome measures valid/reliable | Losses of follow up taken into account                                                          | Total |
| Alonso et al (2012)    | 2b                       | 1                          | 1                       | 0                                     | 1                       | 1                                   | 1                                             | 1                         | 1                                                             | 1                                                              | 1                                                                    | 1                      | 1                               | 1                                                                                               | 12    |
| Bjørneboe et al (2016) | 1b                       | 1                          | 1                       | 0                                     | 1                       | 1                                   | 0                                             | 1                         | 1                                                             | 1                                                              | 1                                                                    | 1                      | 1                               | 1                                                                                               | 11    |
| Chesson et al (2020)   | 1b                       | 1                          | 1                       | 0                                     | 1                       | 1                                   | 1                                             | 1                         | 0                                                             | 0                                                              | 1                                                                    | 1                      | 1                               | 1                                                                                               | 10    |
| Cox et al (2010)       | 1b                       | 1                          | 1                       | 1                                     | 1                       | 1                                   | 1                                             | 1                         | 0                                                             | 0                                                              | 1                                                                    | 1                      | 1                               | 1                                                                                               | 11    |
| Cox et al (2010)a      | 1b                       | 1                          | 1                       | 1                                     | 1                       | 1                                   | 1                                             | 1                         | 0                                                             | 0                                                              | 1                                                                    | 1                      | 1                               | 1                                                                                               | 11    |
| Cox et al (2008)       | 2b                       | 1                          | 1                       | 1                                     | 1                       | 1                                   | 1                                             | 0                         | 0                                                             | 0                                                              | 1                                                                    | 1                      | 1                               | 1                                                                                               | 10    |
| Cox et al (2004)       | 1b                       | 1                          | 1                       | 0                                     | 1                       | 1                                   | 1                                             | 1                         | 0                                                             | 0                                                              | 1                                                                    | 1                      | 1                               | 1                                                                                               | 10    |
| Cunniffe et al (2011)  | 1b                       | 1                          | 1                       | 0                                     | 1                       | 1                                   | 1                                             | 0                         | 1                                                             | 1                                                              | 1                                                                    | 1                      | 1                               | 1                                                                                               | 11    |
| Da Boit et al (2015)   | 1b                       | 1                          | 1                       | 0                                     | 1                       | 1                                   | 1                                             | 0                         | 1                                                             | 1                                                              | 1                                                                    | 1                      | 1                               | 1                                                                                               | 11    |

## Online Supplementary Table C: Modified Downs and Black and Oxford Level of Evidence

|                            |    |   |   |   |   |   |   |   |   |   |   |   |   |   |    |
|----------------------------|----|---|---|---|---|---|---|---|---|---|---|---|---|---|----|
| Davison et al (2020)       | 2b | 1 | 1 | 0 | 1 | 1 | 1 | 1 | 0 | 0 | 1 | 1 | 1 | 1 | 10 |
| Derman et al (2019)        | 2b | 1 | 1 | 1 | 1 | 1 | 1 | 0 | 1 | 1 | 1 | 1 | 1 | 1 | 12 |
| Derman et al (2014)        | 2b | 1 | 1 | 1 | 1 | 1 | 1 | 0 | 1 | 1 | 1 | 1 | 1 | 1 | 12 |
| Dressendorfer et al (2002) | 2b | 1 | 1 | 0 | 1 | 1 | 1 | 0 | 0 | 0 | 1 | 1 | 1 | 1 | 9  |
| Edouard et al (2015)       | 2b | 1 | 1 | 1 | 1 | 1 | 1 | 1 | 1 | 1 | 1 | 1 | 1 | 1 | 13 |
| Edouard et al (2014)       | 2b | 1 | 1 | 0 | 1 | 1 | 1 | 1 | 1 | 1 | 1 | 1 | 1 | 1 | 12 |
| Edouard et al (2013)       | 2b | 1 | 1 | 0 | 1 | 1 | 1 | 1 | 1 | 1 | 1 | 1 | 1 | 1 | 12 |
| Fahlman and Engels (2005)  | 2b | 1 | 1 | 1 | 0 | 1 | 1 | 1 | 1 | 1 | 1 | 1 | 1 | 1 | 12 |
| Fricker et al (2005)       | 2b | 1 | 1 | 0 | 1 | 1 | 1 | 1 | 0 | 0 | 1 | 1 | 1 | 1 | 10 |
| Furusawa et al (2007)      | 3b | 1 | 1 | 0 | 1 | 1 | 1 | 0 | 0 | 0 | 1 | 1 | 1 | 1 | 9  |
| Gleeson et al (2012)a      | 2b | 1 | 1 | 0 | 1 | 1 | 1 | 1 | 0 | 0 | 1 | 1 | 1 | 1 | 10 |
| Gleeson et al (2011)       | 1b | 1 | 1 | 0 | 1 | 1 | 1 | 1 | 0 | 0 | 1 | 1 | 1 | 1 | 10 |
| Hall et al (2007)          | 1b | 1 | 1 | 0 | 1 | 1 | 1 | 1 | 0 | 0 | 1 | 1 | 1 | 1 | 10 |
| Hanstad et al (2011)       | 2b | 1 | 1 | 0 | 1 | 1 | 1 | 1 | 1 | 1 | 1 | 1 | 1 | 1 | 12 |
| Haywood et al (2014)       | 1b | 1 | 1 | 0 | 1 | 1 | 1 | 1 | 0 | 0 | 1 | 1 | 1 | 1 | 10 |
| He et al (2014)            | 1b | 1 | 1 | 1 | 1 | 1 | 1 | 1 | 0 | 0 | 0 | 1 | 1 | 1 | 10 |
| He et al (2013)a           | 1b | 1 | 1 | 1 | 1 | 1 | 1 | 1 | 0 | 0 | 1 | 1 | 1 | 1 | 11 |

## Online Supplementary Table C: Modified Downs and Black and Oxford Level of Evidence

|                                 |    |   |   |   |   |   |   |   |   |   |   |   |   |   |    |
|---------------------------------|----|---|---|---|---|---|---|---|---|---|---|---|---|---|----|
| He et al (2013)b                | 2b | 1 | 1 | 1 | 1 | 1 | 1 | 1 | 0 | 0 | 1 | 1 | 1 | 1 | 11 |
| Henson et al (2008)             | 1b | 1 | 1 | 1 | 1 | 1 | 0 | 1 | 0 | 0 | 1 | 1 | 1 | 1 | 10 |
| Ihalainen et al (2015)          | 2b | 1 | 1 | 1 | 1 | 1 | 1 | 0 | 0 | 0 | 1 | 1 | 1 | 1 | 10 |
| Kekkonen et al (2007)           | 1b | 1 | 1 | 1 | 1 | 1 | 1 | 1 | 0 | 1 | 1 | 1 | 1 | 1 | 12 |
| Laaksi et al (2007)             | 1b | 1 | 1 | 0 | 1 | 1 | 1 | 1 | 1 | 1 | 1 | 1 | 1 | 1 | 12 |
| McFarlin et al (2013)           | 1b | 1 | 1 | 1 | 1 | 1 | 0 | 1 | 0 | 0 | 1 | 1 | 1 | 1 | 10 |
| Michalickova et al (2016)       | 1b | 1 | 1 | 1 | 1 | 1 | 0 | 1 | 0 | 0 | 1 | 1 | 1 | 0 | 9  |
| Nehlsen-Cannarella et al (2000) | 2b | 1 | 1 | 1 | 1 | 1 | 1 | 1 | 0 | 0 | 1 | 1 | 1 | 1 | 11 |
| Nieman et al (2008)             | 2b | 1 | 1 | 0 | 0 | 1 | 0 | 1 | 0 | 0 | 1 | 1 | 1 | 0 | 7  |
| Nordstrøm et al (2020)          | 2b | 1 | 1 | 1 | 1 | 1 | 1 | 0 | 1 | 1 | 1 | 1 | 1 | 1 | 12 |
| Orhant et al (2010)             | 2b | 1 | 1 | 0 | 1 | 1 | 0 | 0 | 1 | 1 | 1 | 1 | 0 | 0 | 8  |
| Orysiak et al (2017)            | 2b | 1 | 1 | 1 | 1 | 1 | 1 | 1 | 0 | 0 | 1 | 1 | 1 | 1 | 11 |
| Pacque et al (2007)             | 2b | 1 | 1 | 1 | 1 | 1 | 1 | 1 | 1 | 1 | 0 | 1 | 1 | 1 | 12 |
| Peters et al (2004)             | 2b | 1 | 1 | 1 | 1 | 1 | 0 | 1 | 1 | 1 | 0 | 1 | 1 | 0 | 10 |
| Pyne et al (2001)               | 2b | 1 | 1 | 1 | 1 | 1 | 1 | 1 | 1 | 1 | 0 | 1 | 1 | 1 | 12 |
| Rama et al (2013)               | 3b | 1 | 1 | 1 | 1 | 1 | 1 | 1 | 0 | 0 | 0 | 1 | 1 | 1 | 10 |

**Online Supplementary Table C: Modified Downs and Black and Oxford Level of Evidence**

|                          |    |   |   |   |   |   |   |   |   |   |   |   |   |   |    |
|--------------------------|----|---|---|---|---|---|---|---|---|---|---|---|---|---|----|
| Sawczuk et al (2020)     | 2b | 1 | 1 | 0 | 1 | 1 | 1 | 1 | 0 | 0 | 1 | 1 | 1 | 1 | 10 |
| Schwellnus et al (2012)  | 2b | 1 | 1 | 0 | 1 | 1 | 0 | 0 | 1 | 1 | 1 | 1 | 1 | 1 | 10 |
| Soligard et al (2017)    | 2b | 1 | 1 | 1 | 1 | 1 | 1 | 0 | 1 | 1 | 1 | 1 | 1 | 1 | 12 |
| Somerville et al (2019)  | 2b | 1 | 1 | 1 | 1 | 1 | 0 | 0 | 1 | 1 | 1 | 1 | 1 | 1 | 11 |
| Somerville et al (2019)a | 2b | 1 | 1 | 1 | 1 | 1 | 0 | 1 | 0 | 0 | 1 | 1 | 1 | 1 | 10 |
| Spence et al (2007)      | 1b | 1 | 1 | 0 | 1 | 1 | 1 | 1 | 0 | 0 | 1 | 1 | 1 | 1 | 10 |
| Steffen et al (2019)     | 2b | 1 | 1 | 0 | 1 | 1 | 1 | 0 | 1 | 1 | 1 | 1 | 1 | 1 | 11 |
| Stephenson et al (2019)  | 3b | 1 | 1 | 0 | 1 | 1 | 1 | 1 | 0 | 0 | 1 | 1 | 1 | 1 | 10 |
| Svendsen et al (2016)    | 1b | 1 | 1 | 1 | 1 | 1 | 1 | 1 | 0 | 0 | 1 | 1 | 1 | 1 | 11 |
| Tiollier et al (2005)a   | 2b | 1 | 1 | 0 | 1 | 1 | 1 | 1 | 0 | 0 | 1 | 1 | 1 | 1 | 10 |
| Valtonen et al (2019)    | 1b | 1 | 1 | 0 | 1 | 1 | 1 | 1 | 1 | 1 | 1 | 1 | 1 | 1 | 12 |
| West et al (2011)        | 1b | 1 | 1 | 1 | 1 | 1 | 1 | 0 | 0 | 0 | 1 | 1 | 1 | 1 | 10 |

**Online Supplementary Table C: Modified Downs and Black and Oxford Level of Evidence**
